# Supplementary material for: A Z-scheme heterojunction ZnCdS/P2W12Fe9AO nanocomposite based on an adsorption–photoreduction synergistic strategy for uranium reduction
Source: Royal Society of Chemistry journal article supplement (doi:10.1039/d4qi03221g), 2025-01-01
Supplement: d4qi03221g1.pdf [file d4qi03221g1.pdf]

## Z-scheme heterojunction ZnCdS/P<sub>2</sub>W<sub>12</sub>Fe<sub>9</sub>AO nanocomposite based on an adsorption-photocatalytic strategy for efficient uranium reduction

Yu Liu, Donghui Cui, Xue Yang, Fengyan Li\*

Key Laboratory of Polyoxometalate and Reticular Material Chemistry of Ministry of Education, College of Chemistry, Northeast Normal University, Changchun 130024, P. R. China.

Email address: lify525@nenu.edu.cn

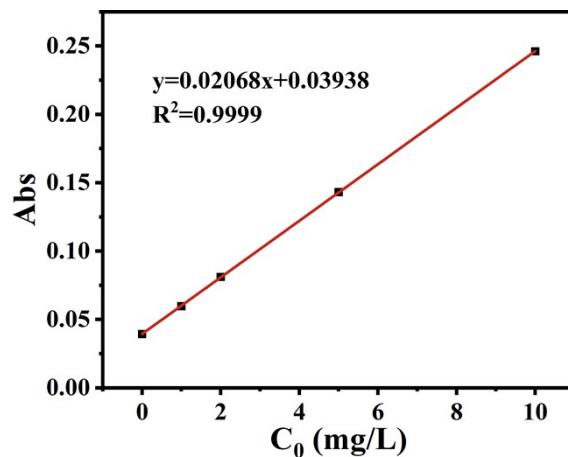

Fig. S1. Standard curve for the measurement of uranium by the Arsenazo III method.

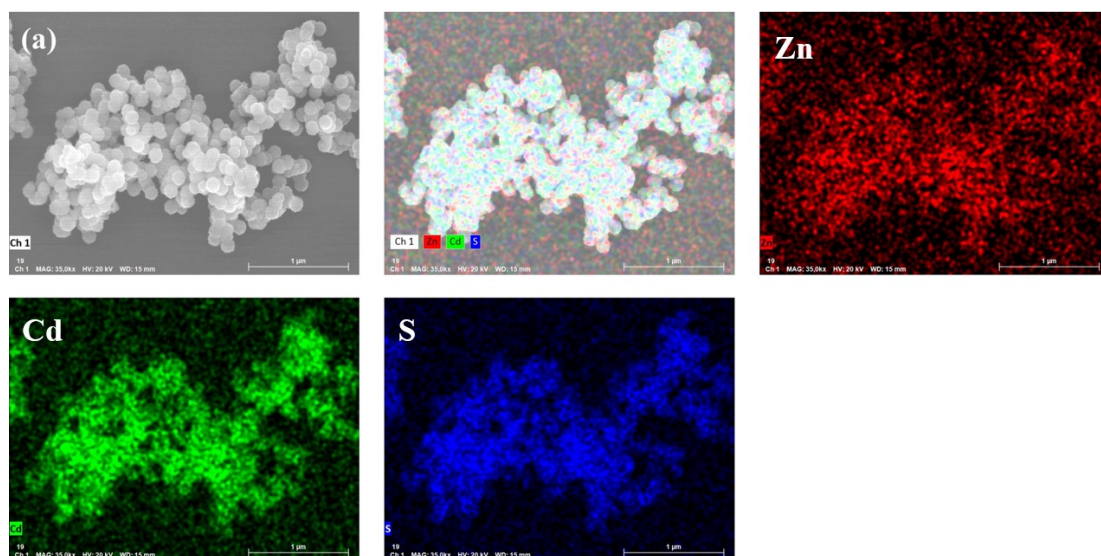

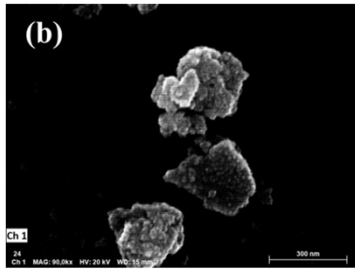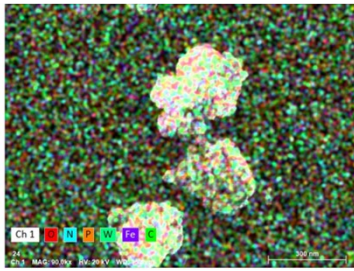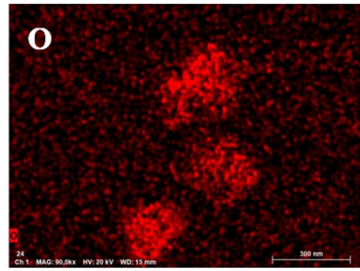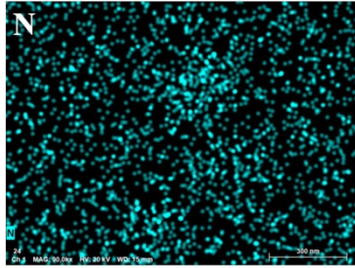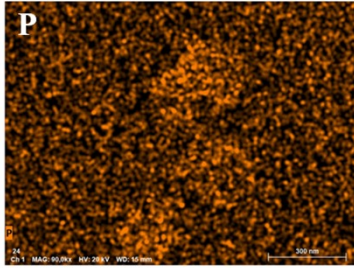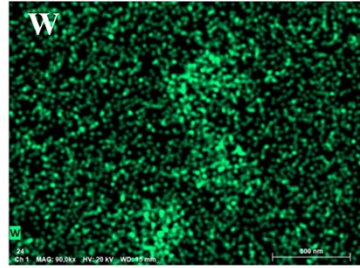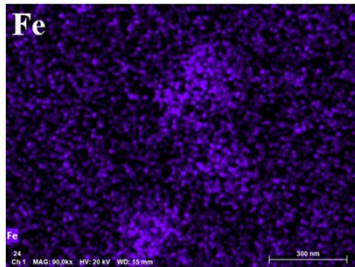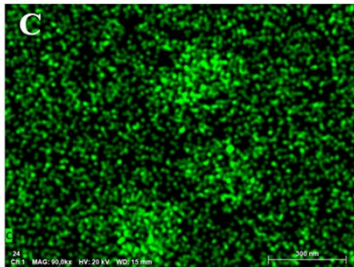

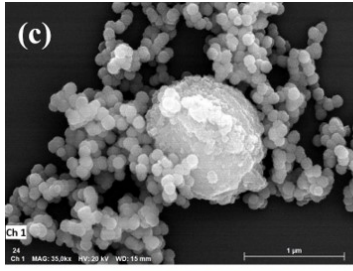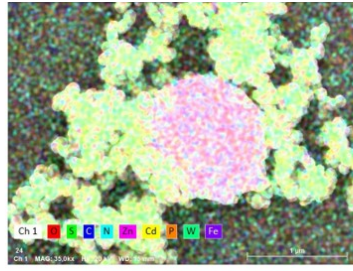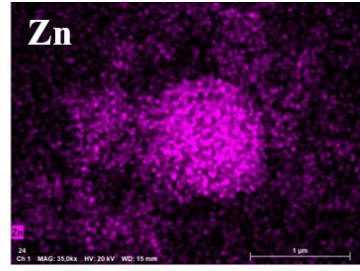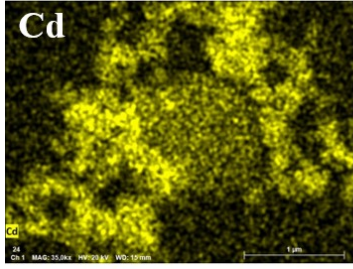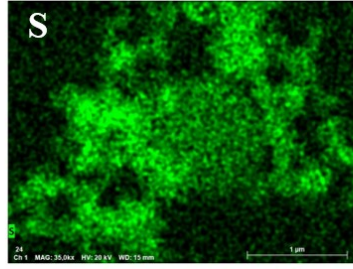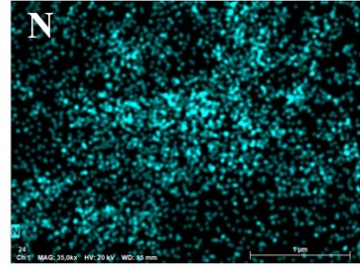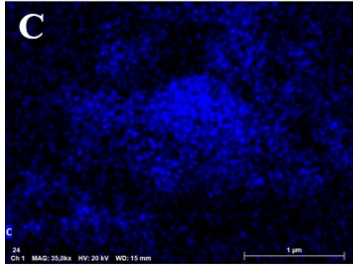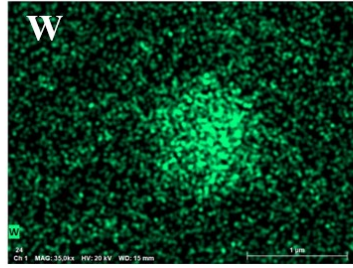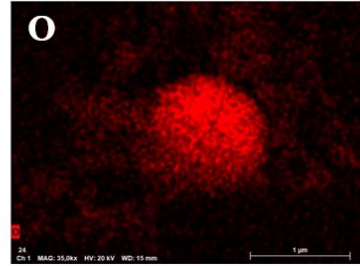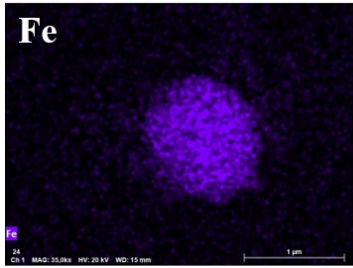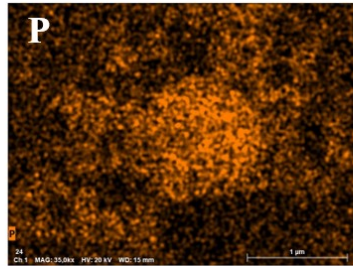

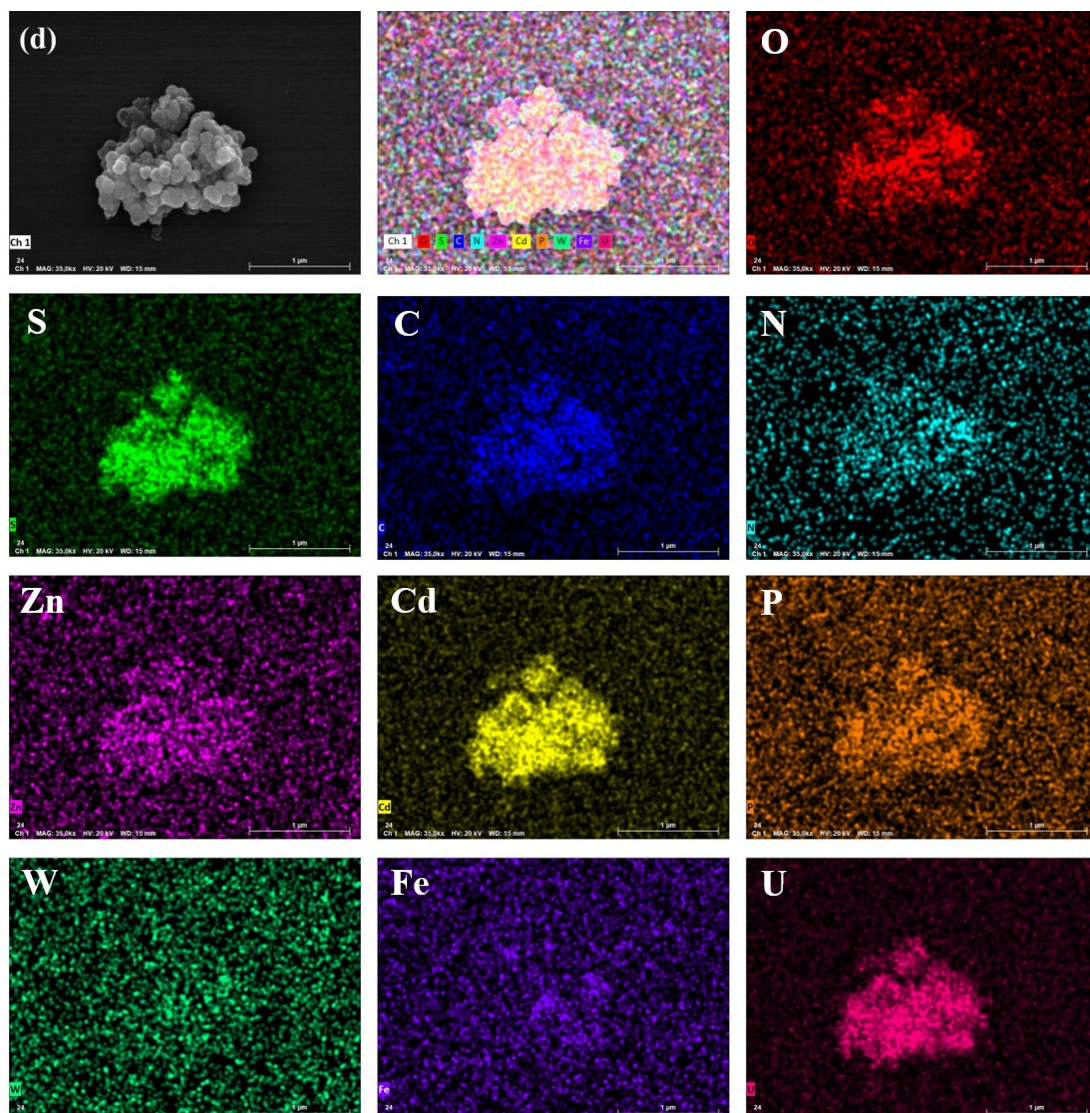

**Fig. S2.** (a) SEM elemental mapping images of ZnCdS. (b) P<sub>2</sub>W<sub>12</sub>Fe<sub>9</sub>AO. (c) ZnCdS-P<sub>2</sub>W<sub>12</sub>Fe<sub>9</sub>AO. (d) ZnCdS-P<sub>2</sub>W<sub>12</sub>Fe<sub>9</sub>AO-U.

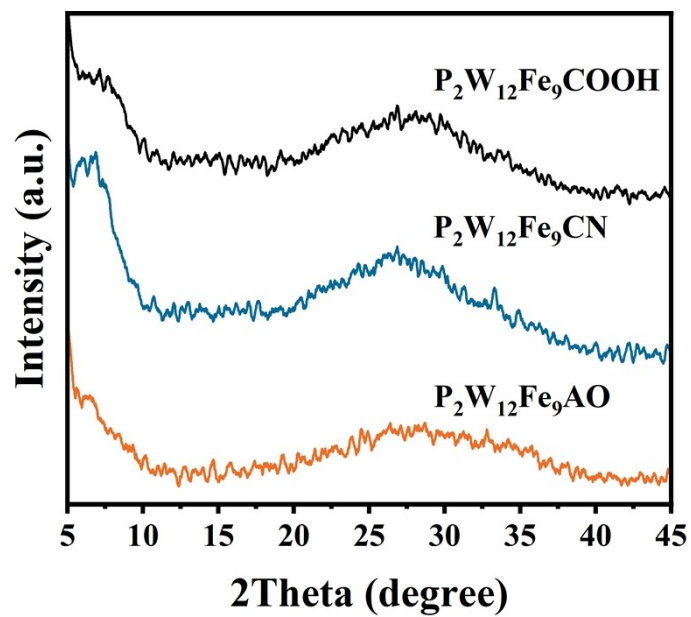

Fig. S3. XRD patterns of  $P_2W_{12}Fe_9COOH$ ,  $P_2W_{12}Fe_9CN$  and  $PW_{12}AO$ .

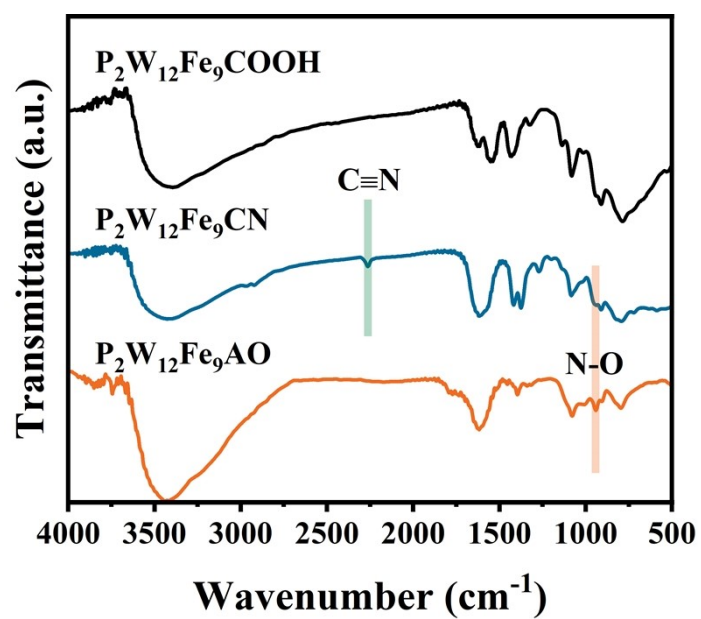

Fig. S4. FT-IR spectra of  $P_2W_{12}Fe_9COOH$ ,  $P_2W_{12}Fe_9CN$  and  $PW_{12}AO$ .

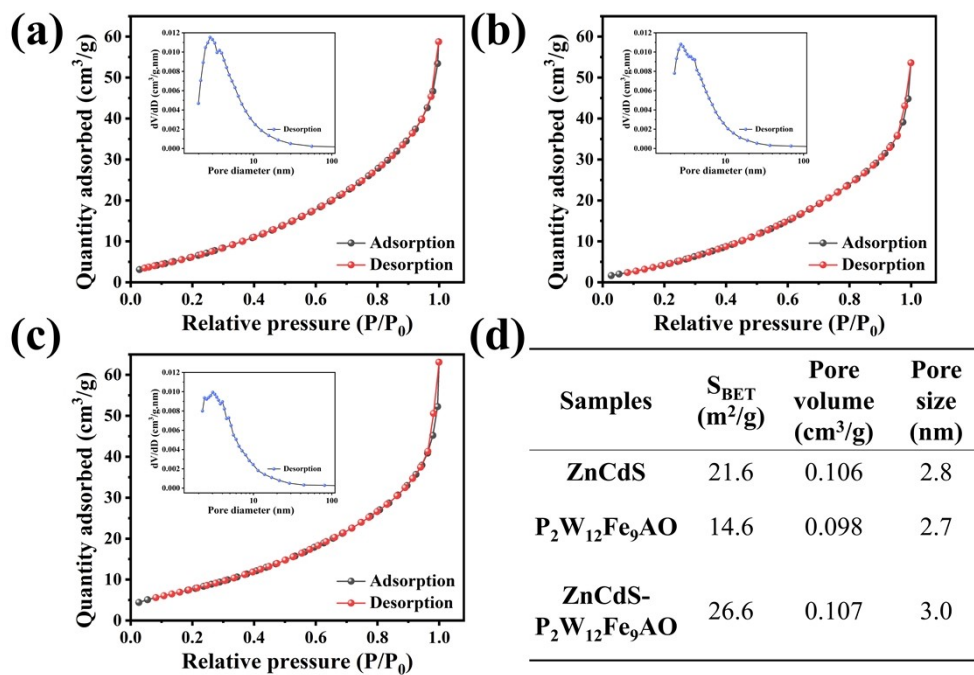

Fig. S5. N<sub>2</sub> adsorption–desorption isotherms and Pore size distribution of ZnCdS, P<sub>2</sub>W<sub>12</sub>Fe<sub>9</sub>AO, and ZnCdS-P<sub>2</sub>W<sub>12</sub>Fe<sub>9</sub>AO.

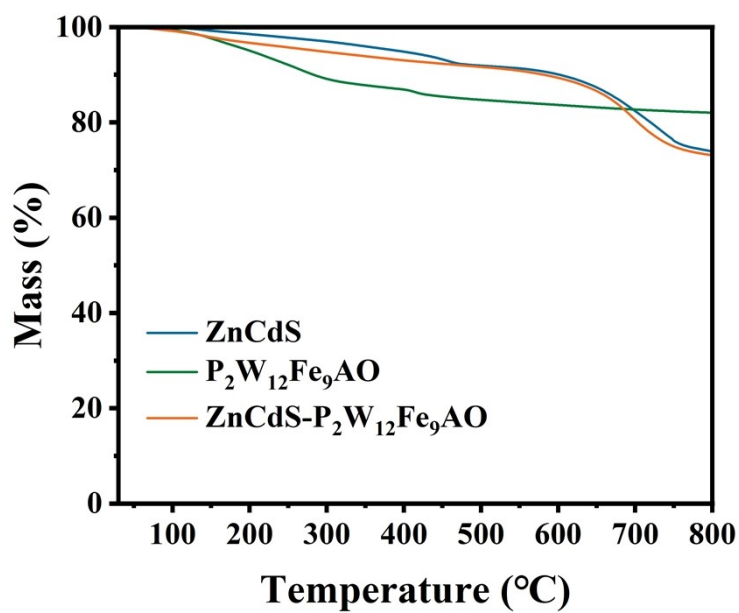

Fig. S6. TGA curves of ZnCdS, P<sub>2</sub>W<sub>12</sub>Fe<sub>9</sub>AO, and ZnCdS-P<sub>2</sub>W<sub>12</sub>Fe<sub>9</sub>AO under N<sub>2</sub> atmosphere.

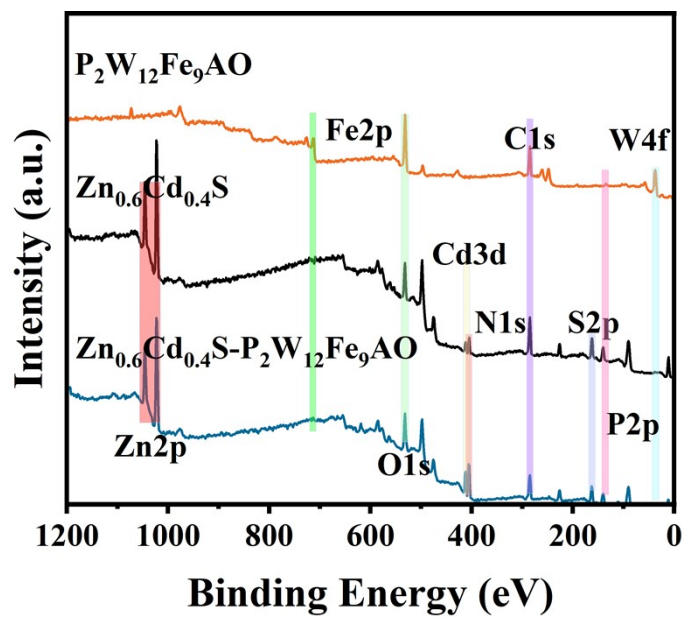

Fig. S7. XPS spectra of ZnCdS,  $P_2W_{12}Fe_9AO$  and  $ZnCdS-P_2W_{12}Fe_9AO$ .

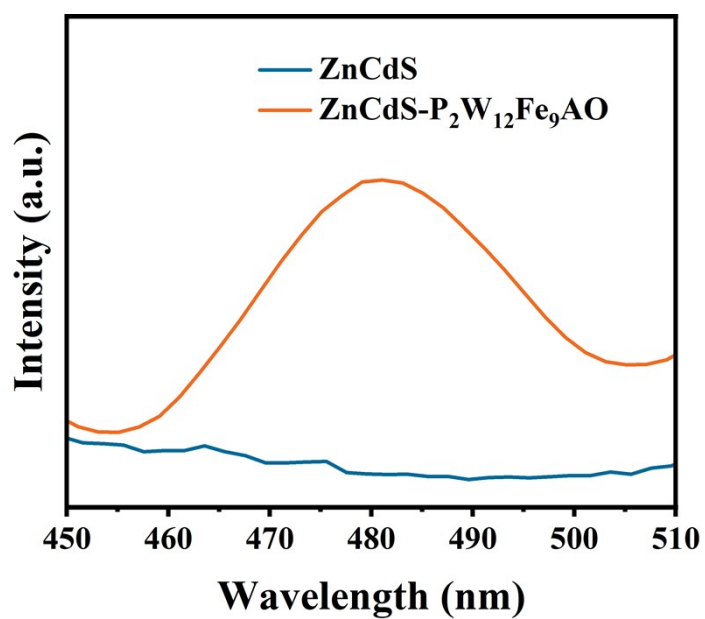

Fig. S8. Steady-state PL spectra of ZnCdS and  $ZnCdS-P_2W_{12}Fe_9AO$ .

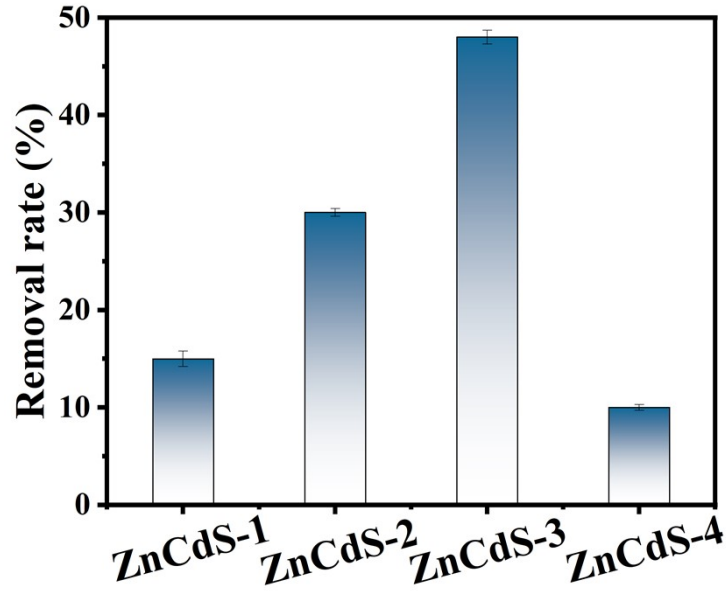

Fig. S9. Uranium removal performance of ZnCdS-1, ZnCdS-2, ZnCdS-3, and ZnCdS-4 ( $C_0 = 200$  mg/L pH = 5).

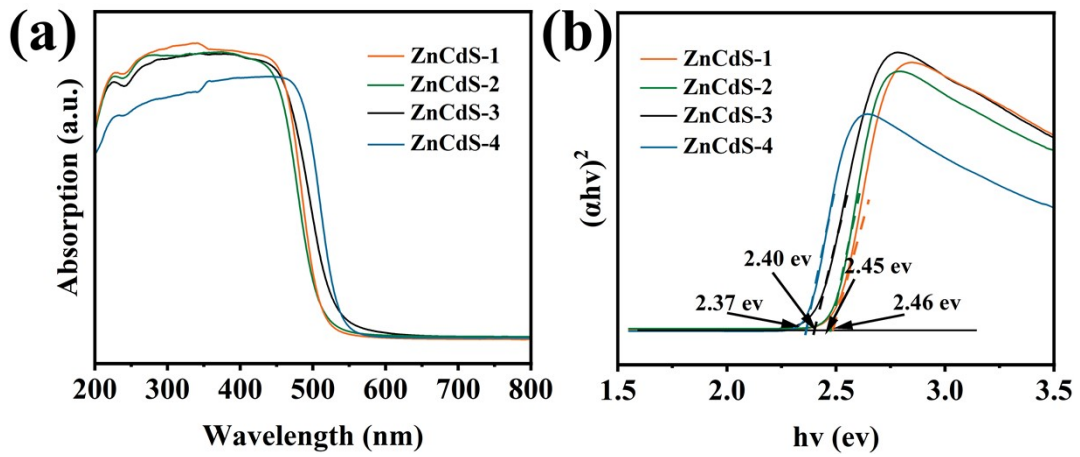

Fig. S10 (a) UV-vis DRS of ZnCdS-1, ZnCdS-2, ZnCdS-3, and ZnCdS-4. (b) Band gap of ZnCdS-1, ZnCdS-2, ZnCdS-3, and ZnCdS-4.



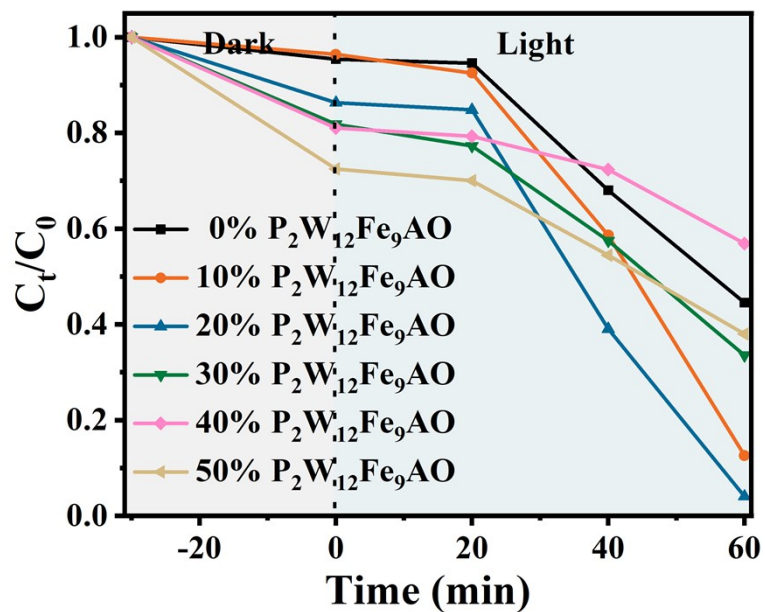

Fig. S11. Uranium removal performance of 0% $P_2W_{12}Fe_9AO$ , 10% $P_2W_{12}Fe_9AO$ , 20% $P_2W_{12}Fe_9AO$ , 30% $P_2W_{12}Fe_9AO$ , 40% $P_2W_{12}Fe_9AO$ , and 50% $P_2W_{12}Fe_9AO$  ( $C_0 = 200$  mg/L pH = 5).

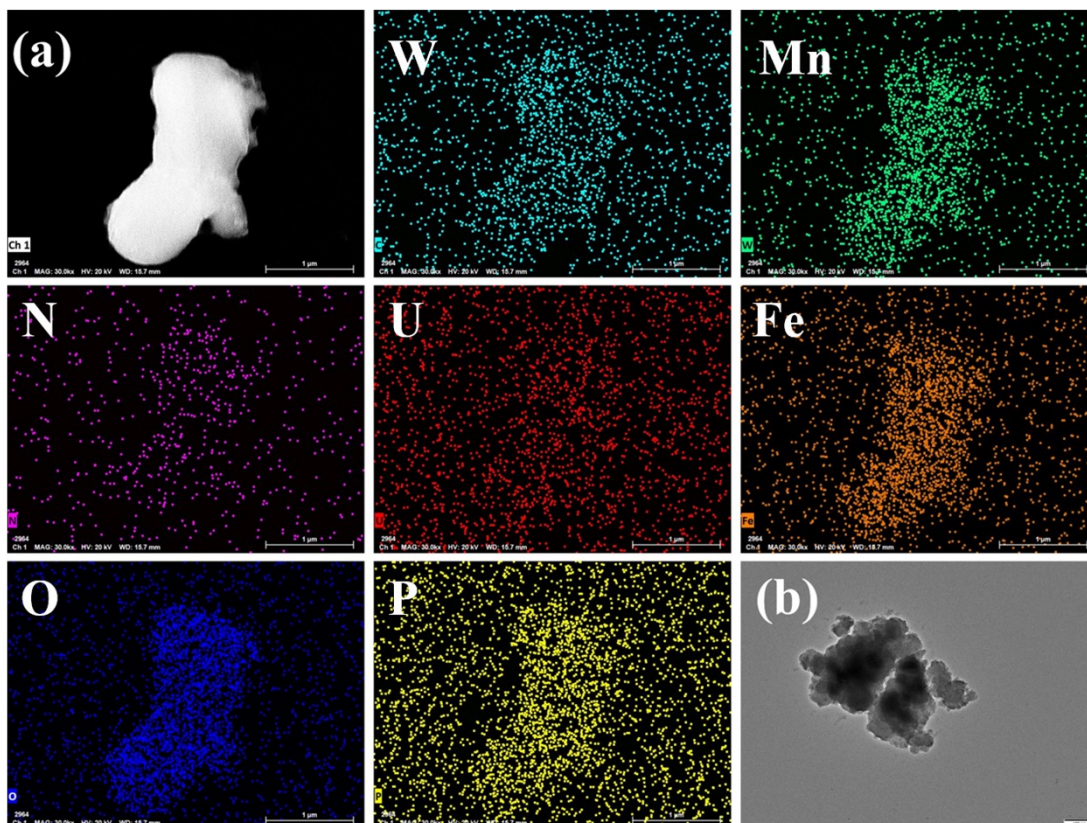

Fig. S12. (a) SEM elemental mapping images of  $P_2W_{12}Fe_9AO-U$ . (b) TEM of  $P_2W_{12}Fe_9AO-U$ .

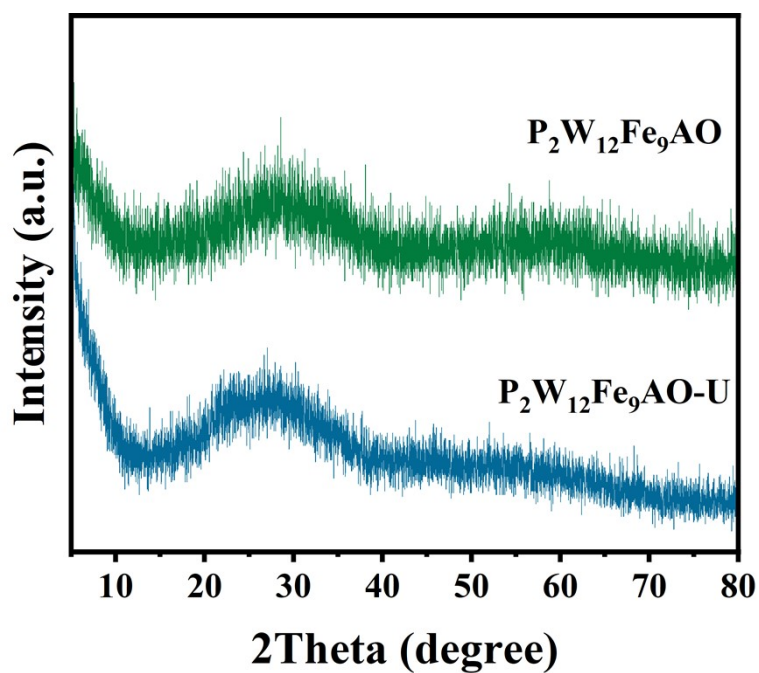

Fig. S13. (a) XRD patterns of  $P_2W_{12}Fe_9AO$  and  $P_2W_{12}Fe_9AO-U$ .

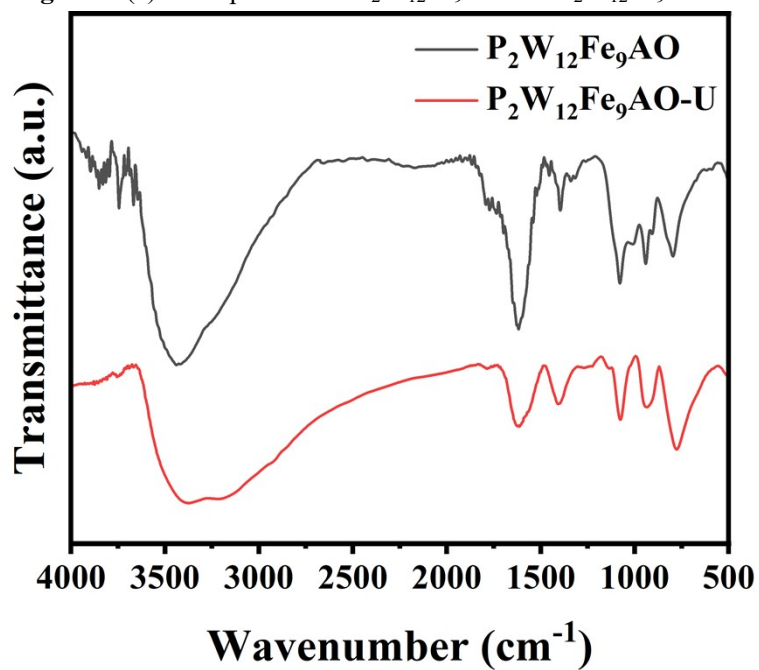

Fig. S14. FT-IR spectra of  $P_2W_{12}Fe_9AO$  and  $P_2W_{12}Fe_9AO-U$ .

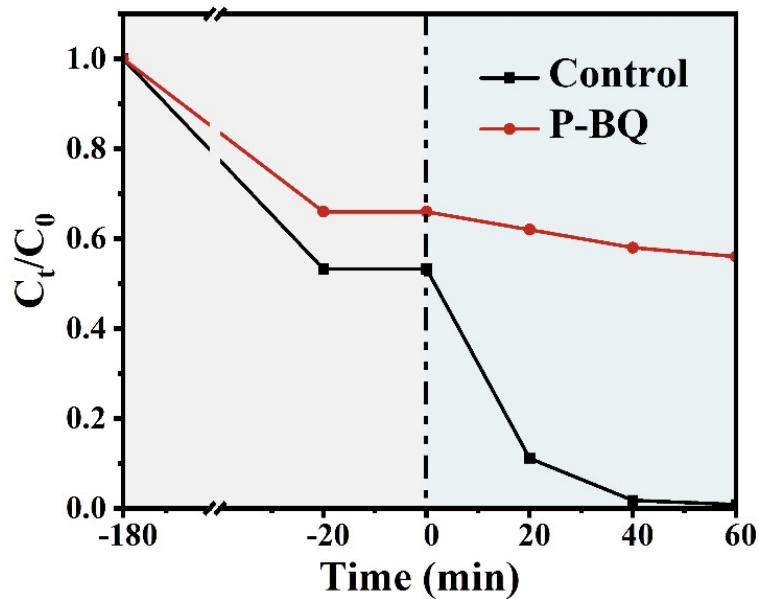

**Fig. S15.** The photocatalytic reduction of U(VI) over ZnCdS-P<sub>2</sub>W<sub>12</sub>Fe<sub>9</sub>AO with the addition of  $\cdot\text{O}_2^-$  radical scavenger under visible light irradiation

**Table S1** Comparison between the ZnCdS-P<sub>2</sub>W<sub>12</sub>Fe<sub>9</sub>AO and other photocatalysts.

| Photocatalysts                                             | C <sub>U(VI)</sub> | RR (%) | Time    | Hole trapping reagents | Ref. |
|------------------------------------------------------------|--------------------|--------|---------|------------------------|------|
| Gd(OH) <sub>3</sub> /Cd <sub>0.8</sub> Zn <sub>0.2</sub> S | 50 mg/L            | 95.2%  | 180 min | No                     | 1    |
| SrTiO <sub>3</sub> /TiO <sub>2</sub>                       | 100 mg/L           | 81.0%  | 180 min | No                     | 2    |
| SnS <sub>2</sub> /g-C <sub>3</sub> N <sub>4</sub>          | 40 mg/L            | 92.7%  | 90 min  | CH <sub>3</sub> OH     | 3    |
| Br-C <sub>3</sub> N <sub>4</sub>                           | 200 mg/L           | 95%    | 60 min  | CH <sub>3</sub> OH     | 4    |
| Fe-CN-3                                                    | 50 mg/L            | 96.4%  | 240 min | CH <sub>3</sub> OH     | 5    |
| MoO <sub>3</sub> QDs/g-C <sub>3</sub> N <sub>4</sub>       | 50 mg/L            | 96.4%  | 150 min | CH <sub>3</sub> OH     | 6    |
| TT-TPP                                                     | 200 mg/L           | 97.5%  | 600 min | No                     | 7    |
| ECUT-AQ                                                    | 50 mg/L            | 86.0%  | 120 min | ascorbic acid          | 8    |

ZnCdS-P<sub>2</sub>W<sub>12</sub>Fe<sub>9</sub>AO 250 mg/L 97.7% 120 min No This work

---

**Table S2** Adsorption energy of P<sub>2</sub>W<sub>12</sub>Fe<sub>9</sub>CN and P<sub>2</sub>W<sub>12</sub>Fe<sub>9</sub>AO for U(VI).

| Model                                             | Adsorbate                     | Total energy (eV) | Slab energy (eV) | Molecular energy (eV) | Eads (eV) |
|---------------------------------------------------|-------------------------------|-------------------|------------------|-----------------------|-----------|
| P <sub>2</sub> W <sub>12</sub> Fe <sub>9</sub> CN | UO <sub>2</sub> <sup>2+</sup> | -987.774          | -956.396         | -25.7627              | -2.816    |
| P <sub>2</sub> W <sub>12</sub> Fe <sub>9</sub> AO | UO <sub>2</sub> <sup>2+</sup> | -1086.07          | -1051.65         | -25.7627              | -7.011    |

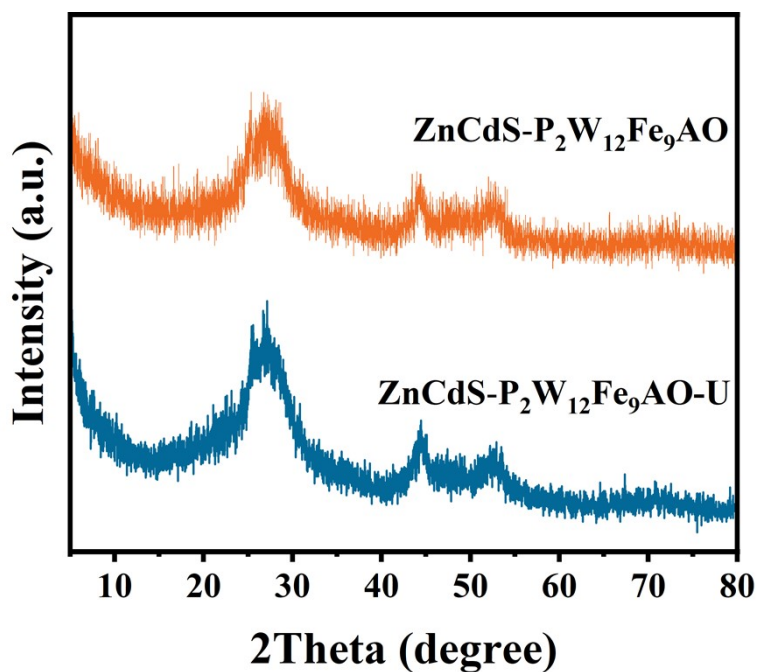

**Fig. S16.** XRD patterns of ZnCdS-P<sub>2</sub>W<sub>12</sub>Fe<sub>9</sub>AO and ZnCdS-P<sub>2</sub>W<sub>12</sub>Fe<sub>9</sub>AO-U

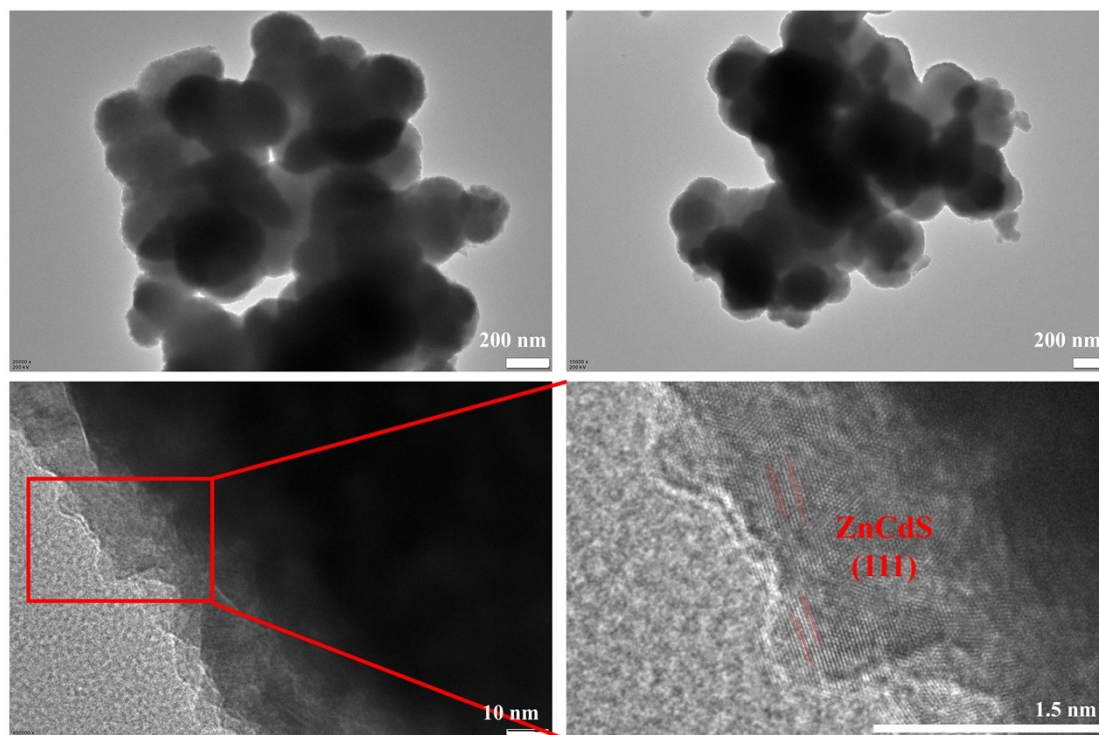

**Fig. S17.** TEM image of ZnCdS-P<sub>2</sub>W<sub>12</sub>Fe<sub>9</sub>AO-U

## References

- 1 W. Liu, Z. Yang, B. Zou, W. Liao, Y. Wang, C. Wang, S. Li, X. Niu, The photocatalytic application of Gd(OH)<sub>3</sub>/Cd<sub>0.8</sub>Zn<sub>0.2</sub>S nanocomposites in U (VI) reduction, *Chem. Eng. J.*, 2023 **466** 143117.
- 2 L. Hu, X.-W. Yan, X.-J. Zhang, D. Shan, Integration of adsorption and reduction for uranium uptake based on SrTiO<sub>3</sub>/TiO<sub>2</sub> electrospun nanofibers, *Appl. Surf. Sci.*, 2018 **428** 819-824.
- 3 C. Liu, Z. Dong, C. Yu, J. Gong, Y. Wang, Z. Zhang, Y. Liu, Study on photocatalytic performance of hexagonal SnS<sub>2</sub>/g-C<sub>3</sub>N<sub>4</sub> nanosheets and its application to reduce U (VI) in sunlight, *Appl. Surf. Sci.*, 2021 **537** 147754.
- 4 J. Xue, B. Wang, Z. Li, Z. Xie, Z. Le, Bromine doped g-C<sub>3</sub>N<sub>4</sub> with enhanced photocatalytic reduction in U (VI), *Res. Chem. Intermed.*, 2022 **48** 49-65.
- 5 W. Wei, Enhancing the photocatalytic performance of g-C<sub>3</sub>N<sub>4</sub> by using iron single-atom doping for the reduction of U(VI) in aqueous solutions, *J. Solid State Chem.*, 2022.
- 6 X. Zhu, Z. Dong, J. Xu, S. Lin, J. Liu, Z. Cheng, X. Cao, Y. Wang, Y. Liu, Z. Zhang, Visible-light induced electron-transfer in MoO<sub>3</sub> QDs/g-C<sub>3</sub>N<sub>4</sub> nanosheets for efficient photocatalytic reduction of U(VI), *J. Alloy. Compd.*, 2022 **926** 166609.
- 7 L. Chen, B. Chen, J. Kang, Z. Yan, Y. Jin, H. Yan, S. Chen, C. Xia, The synthesis of a novel conjugated microporous polymer and application on photocatalytic removal of uranium(VI) from wastewater under visible light, *Chem. Eng. J.*, 2022 **431** 133222.
- 8 F. Yu, Z. Zhu, C. Li, W. Li, R. Liang, S. Yu, Z. Xu, F. Song, Q. Ren, Z. Zhang, A

redox-active perylene-anthraquinone donor-acceptor conjugated microporous polymer with an unusual electron delocalization channel for photocatalytic reduction of uranium (VI) in strongly acidic solution, *Appl. Catal. B-Environ.*, 2022 **314** 121467.
